# Supplementary material for: Involvement of Small Non-Coding RNA and Cell Antigens in Pathogenesis of Extramedullary Multiple Myeloma
Source: MDPI journal article supplement (doi:10.3390/ijms232314765), 2022-11-25
Supplement: s1 [file s1]

## Involvement of small non-coding RNA and cell antigens in pathogenesis of extramedullary multiple myeloma

**Supplementary Table S1** A list of 43 significantly deregulated microRNAs (miRNA) between patients with extramedullary disease (EMD) and multiple myeloma (MM) patients (adjusted  $p < 0.025$ ) identified in the exploration phase of the study by next-generation sequencing.

| miRNA             | logFC  | average expression | p-value               | adjusted p-value      |
|-------------------|--------|--------------------|-----------------------|-----------------------|
| miR-4746-5p       | 1.891  | 0.467              | $2.432 \cdot 10^{-6}$ | $1.185 \cdot 10^{-3}$ |
| <b>miR-26a-5p</b> | -1.158 | 16.334             | $3.751 \cdot 10^{-6}$ | $1.185 \cdot 10^{-3}$ |
| <b>miR-92a-3p</b> | 1.693  | 13.075             | $9.052 \cdot 10^{-6}$ | $1.328 \cdot 10^{-3}$ |
| miR-548ag         | 2.029  | 0.789              | $1.155 \cdot 10^{-5}$ | $1.328 \cdot 10^{-3}$ |
| <b>miR-18a-3p</b> | 1.759  | 5.093              | $1.700 \cdot 10^{-6}$ | $1.328 \cdot 10^{-3}$ |
| <b>miR-339-3p</b> | -1.403 | 5.490              | $1.723 \cdot 10^{-5}$ | $1.328 \cdot 10^{-3}$ |
| miR-3653-5p       | -1.717 | 4.819              | $1.806 \cdot 10^{-5}$ | $1.328 \cdot 10^{-3}$ |
| <b>miR-30e-5p</b> | -1.096 | 12.501             | $2.003 \cdot 10^{-5}$ | $1.328 \cdot 10^{-3}$ |
| <b>miR-29a-3p</b> | -1.367 | 12.986             | $2.100 \cdot 10^{-5}$ | $1.328 \cdot 10^{-3}$ |
| <b>miR-18a-5p</b> | 1.872  | 5.292              | $2.101 \cdot 10^{-5}$ | $1.328 \cdot 10^{-3}$ |
| let-7b-5p         | -1.497 | 13.210             | $2.797 \cdot 10^{-5}$ | $1.423 \cdot 10^{-3}$ |
| let-7i-3p         | -1.955 | 5.201              | $3.060 \cdot 10^{-5}$ | $1.423 \cdot 10^{-3}$ |
| miR-26b-5p        | -0.914 | 15.080             | $3.149 \cdot 10^{-5}$ | $1.423 \cdot 10^{-3}$ |
| miR-9-5p          | 1.933  | 10.263             | $3.367 \cdot 10^{-5}$ | $1.423 \cdot 10^{-3}$ |
| <b>miR-126-3p</b> | -2.066 | 4.211              | $3.599 \cdot 10^{-5}$ | $1.423 \cdot 10^{-3}$ |
| miR-29c-5p        | -1.275 | 7.227              | $3.602 \cdot 10^{-5}$ | $1.423 \cdot 10^{-3}$ |
| let-7g-5p         | -1.112 | 15.376             | $3.920 \cdot 10^{-5}$ | $1.457 \cdot 10^{-3}$ |
| miR-29b-3p        | -1.197 | 10.088             | $6.843 \cdot 10^{-5}$ | $2.403 \cdot 10^{-3}$ |
| miR-29c-3p        | -1.336 | 11.945             | $7.586 \cdot 10^{-5}$ | $2.523 \cdot 10^{-3}$ |
| let-7g-3p         | -1.308 | 3.750              | $1.802 \cdot 10^{-4}$ | $5.694 \cdot 10^{-3}$ |
| miR-548ab         | 1.618  | 0.500              | $2.019 \cdot 10^{-4}$ | $6.077 \cdot 10^{-3}$ |
| <b>miR-708-5p</b> | -2.726 | 6.888              | $4.810 \cdot 10^{-4}$ | $1.382 \cdot 10^{-2}$ |
| miR-25-5p         | 1.129  | 5.989              | $5.079 \cdot 10^{-4}$ | $1.396 \cdot 10^{-2}$ |
| miR-29a-5p        | -1.250 | 4.769              | $6.020 \cdot 10^{-4}$ | $1.585 \cdot 10^{-2}$ |
| miR-1269a         | 3.690  | 3.895              | $6.778 \cdot 10^{-4}$ | $1.713 \cdot 10^{-2}$ |
| <b>miR-424-3p</b> | 2.652  | 4.654              | $7.321 \cdot 10^{-4}$ | $1.780 \cdot 10^{-2}$ |
| miR-3176          | 1.426  | 1.564              | $8.029 \cdot 10^{-4}$ | $1.824 \cdot 10^{-2}$ |
| miR-28-5p         | -1.373 | 8.471              | $8.419 \cdot 10^{-4}$ | $1.824 \cdot 10^{-2}$ |
| miR-5696          | -1.133 | 2.076              | $8.455 \cdot 10^{-4}$ | $1.824 \cdot 10^{-2}$ |
| miR-17-3p         | 1.083  | 7.981              | $8.657 \cdot 10^{-4}$ | $1.824 \cdot 10^{-2}$ |
| miR-1260a         | -1.135 | 2.420              | $1.047 \cdot 10^{-3}$ | $2.074 \cdot 10^{-2}$ |
| miR-454-5p        | 1.003  | 3.645              | $1.079 \cdot 10^{-3}$ | $2.074 \cdot 10^{-2}$ |
| miR-503-5p        | 3.300  | 3.735              | $1.088 \cdot 10^{-3}$ | $2.074 \cdot 10^{-2}$ |
| miR-17-5p         | 1.167  | 10.283             | $1.116 \cdot 10^{-3}$ | $2.074 \cdot 10^{-2}$ |
| miR-93-5p         | 0.906  | 12.228             | $1.172 \cdot 10^{-3}$ | $2.099 \cdot 10^{-2}$ |
| let-7b-3p         | -1.335 | 3.250              | $1.196 \cdot 10^{-3}$ | $2.099 \cdot 10^{-2}$ |
| miR-664a-5p       | -1.103 | 6.126              | $1.264 \cdot 10^{-3}$ | $2.159 \cdot 10^{-2}$ |
| miR-126-5p        | -1.507 | 6.056              | $1.323 \cdot 10^{-3}$ | $2.201 \cdot 10^{-2}$ |

|              |        |        |                       |                       |
|--------------|--------|--------|-----------------------|-----------------------|
| miR-18b-5p   | 1.685  | 1.953  | $1.530 \cdot 10^{-3}$ | $2.455 \cdot 10^{-2}$ |
| miR-5188     | -1.222 | 0.339  | $1.593 \cdot 10^{-3}$ | $2.455 \cdot 10^{-2}$ |
| miR-92a-1-5p | 1.358  | 7.485  | $1.651 \cdot 10^{-3}$ | $2.468 \cdot 10^{-2}$ |
| miR-7-5p     | 1.243  | 10.751 | $1.679 \cdot 10^{-3}$ | $2.468 \cdot 10^{-2}$ |
| miR-106a-5p  | 1.133  | 5.876  | $2.064 \cdot 10^{-3}$ | $2.899 \cdot 10^{-2}$ |

FC – fold change; miRNAs in bold were chosen for further validation phase of the study

**Supplementary Table S2** Receiver operating characteristic analysis of validated microRNAs.

| EMD vs. MM | AUC (95% CI)     | p-value      | cut-off  | Sensitivity | Specificity |
|------------|------------------|--------------|----------|-------------|-------------|
| miR-18a-5p | 0.53 (0.38–0.69) | 0.701        | –        |             |             |
| miR-339-3p | 0.58 (0.38–0.79) | 0.458        | –        |             |             |
| miR-18a-3p | 0.58 (0.43–0.73) | 0.313        | –        |             |             |
| miR-30e-5p | 0.71 (0.57–0.85) | <b>0.009</b> | ≤8.8054  | 80.0%       | 64.1%       |
| miR-92a-3p | 0.61 (0.46–0.76) | 0.159        | –        |             |             |
| miR-26a-5p | 0.74 (0.60–0.87) | <b>0.003</b> | ≤37.6610 | 80.0%       | 61.5%       |
| miR-29a-3p | 0.54 (0.34–0.74) | 0.724        | –        |             |             |
| miR-424-3p | 0.57 (0.36–0.78) | 0.525        |          |             |             |
| miR-126-3p | 0.65 (0.43–0.86) | 0.180        |          |             |             |
| miR-708-5p | 0.56 (0.35–0.78) | 0.572        |          |             |             |

<sup>1</sup>AUC – area under the curve, *p*-values in bold are statistically significant.

**Supplementary Table S3** Spearman bivariate correlation between the expression of microRNAs (miRNAs) and continuous clinicopathological data of multiple myeloma (MM) and extramedullary disease (EMD) patients.

| miRNA      | Clinical characteristics                              | N  | $r_s$  | $p$          |
|------------|-------------------------------------------------------|----|--------|--------------|
| miR-339-3p | Age                                                   | 36 | -0.307 | 0.068        |
| miR-18a-3p | Serum M-protein quantity (g·l <sup>-1</sup> )         | 57 | -0.251 | 0.060        |
| miR-30e-5p | Thrombocyte count (10 <sup>9</sup> ·l <sup>-1</sup> ) | 59 | 0.259  | <b>0.048</b> |
| miR-92a-3p | CRP (mg·l <sup>-1</sup> )                             | 59 | -0.222 | 0.091        |
| miR-26a-5p | Thrombocyte count (10 <sup>9</sup> ·l <sup>-1</sup> ) | 59 | 0.274  | <b>0.036</b> |
| miR-708-5p | Age                                                   | 36 | -0.313 | 0.063        |

<sup>1</sup>Correlation of miRNA quantity and clinical characteristics with  $p < 0.1$  reported.  $p$ -values in bold are statistically significant.

**Supplementary Table S4** Correlation between the expression of microRNAs (miRNAs) and categorical clinical characteristics of patients with multiple myeloma (MM) and extramedullary disease (EMD) using Mann-Whitney U-test or Kruskal-Wallis test.

[illegible]

**Supplementary Table S5:** A set of 26 hub genes regulated by significantly deregulated miRNAs (miR-18a-3p, miR-18a-5p, miR-92a-3p, miR-26a-5p, miR-30e-5p) and potentially involved in the pathogenesis of multiple myeloma and extramedullary disease.

| Gene symbol | Degree | Betweenness | Gene symbol | Degree | Betweenness |
|-------------|--------|-------------|-------------|--------|-------------|
| ASH1L       | 5      | 24435.75    | NFIA        | 4      | 16999.39    |
| ATM         | 5      | 24435.75    | CHD7        | 4      | 16999.39    |
| CELF1       | 5      | 24435.75    | BTG2        | 4      | 16028.45    |
| DICER1      | 5      | 24435.75    | CDKN1A      | 4      | 16028.45    |
| GAN         | 5      | 24435.75    | CLIC4       | 4      | 16028.45    |
| HIPK2       | 5      | 24435.75    | PPIA        | 4      | 16028.45    |
| KLHDC10     | 5      | 24435.75    | SMAD4       | 4      | 16028.45    |
| KLHL15      | 5      | 24435.75    | TUT1        | 4      | 16028.45    |
| NUCKS1      | 5      | 24435.75    | ZBTB4       | 4      | 16028.45    |
| RBPJ        | 5      | 24435.75    | HSPA8       | 4      | 16028.45    |
| WAC         | 5      | 24435.75    | KLF6        | 4      | 16028.45    |
| AGO1        | 4      | 16999.39    | POU2F1      | 4      | 16028.45    |
| TRIP12      | 4      | 16999.39    | ULK1        | 4      | 16028.45    |

**Supplementary Table S6:** Protein-protein interaction network of 28 hub genes regulated by key miRNAs significantly deregulated in patients with extramedullary disease compared to multiple myeloma.

| PPI           | String db<br>combined score | String db<br>textmining | String db<br>databases | String db<br>experiments | String db<br>co-expression |
|---------------|-----------------------------|-------------------------|------------------------|--------------------------|----------------------------|
| RB1CC1-ULK1   | 0.999                       | 0.995                   | 0.900                  | 0.951                    | 0.062                      |
| AGO2-DICER1   | 0.999                       | 0.994                   | 0.900                  | 0.978                    | 0.068                      |
| CCND1-CDKN1A  | 0.999                       | 0.990                   | 0.900                  | 0.983                    | 0.085                      |
| AGO1-DICER1   | 0.999                       | 0.994                   | 0.900                  | 0.940                    | 0.068                      |
| CCND1-HSPA8   | 0.986                       | 0.973                   | -                      | 0.502                    | -                          |
| SMAD4-CDKN1A  | 0.981                       | 0.528                   | 0.900                  | 0.632                    | -                          |
| AGO2-AGO1     | 0.976                       | 0.058                   | 0.900                  | 0.769                    | 0.064                      |
| CCND1-SMAD4   | 0.958                       | 0.602                   | 0.900                  | -                        | -                          |
| HSPA8-CLTC    | 0.954                       | 0.831                   | 0.600                  | 0.324                    | 0.116                      |
| CCND1-BTG2    | 0.943                       | 0.459                   | 0.900                  | -                        | -                          |
| CCND1-POU2F1  | 0.910                       | 0.123                   | 0.900                  | -                        | 0.062                      |
| SMAD4-HSPA8   | 0.904                       | 0.081                   | 0.900                  | -                        | -                          |
| BTG2-KLF6     | 0.782                       | 0.377                   | -                      | -                        | 0.666                      |
| AGO2-CCND1    | 0.781                       | 0.402                   | 0.650                  | -                        | -                          |
| AGO2-HSPA8    | 0.773                       | 0.680                   | -                      | 0.305                    | 0.062                      |
| CCND1-AGO1    | 0.720                       | 0.234                   | 0.650                  | -                        | -                          |
| CCND1-ATM     | 0.712                       | 0.712                   | -                      | -                        | -                          |
| TRIP12-ASH1L  | 0.707                       | 0.589                   | -                      | 0.078                    | 0.290                      |
| ATM-CDKN1A    | 0.702                       | 0.703                   | -                      | -                        | -                          |
| TUT1-DICER1   | 0.684                       | 0.626                   | -                      | 0.142                    | 0.095                      |
| SMAD4-RBPJ    | 0.640                       | 0.626                   | -                      | -                        | 0.076                      |
| ATM-SMAD4     | 0.639                       | 0.626                   | -                      | -                        | 0.076                      |
| HSPA8-DICER1  | 0.553                       | 0.372                   | -                      | 0.290                    | 0.078                      |
| ATM-HPK2      | 0.551                       | 0.542                   | -                      | -                        | 0.062                      |
| CCND1-KLF6    | 0.541                       | 0.534                   | -                      | 0.056                    | -                          |
| RBPJ-CDKN1A   | 0.532                       | 0.522                   | -                      | -                        | 0.062                      |
| PPIA-HSPA8    | 0.529                       | 0.398                   | -                      | 0.166                    | 0.137                      |
| AGO2-CHD7     | 0.518                       | 0.455                   | -                      | -                        | 0.151                      |
| CCND1-DICER1  | 0.517                       | 0.512                   | -                      | -                        | 0.052                      |
| CDKN1A-DICER1 | 0.516                       | 0.407                   | -                      | 0.218                    | -                          |
| ZBTB4-HIPK2   | 0.512                       | 0.286                   | -                      | 0.316                    | 0.082                      |
| SMAD4-DICER1  | 0.506                       | 0.449                   | -                      | 0.121                    | 0.063                      |
| WAC-CELF1     | 0.505                       | 0.495                   | -                      | -                        | 0.062                      |
| ATM-TRIP12    | 0.499                       | 0.410                   | -                      | -                        | 0.186                      |
| BTG2-CDKN1A   | 0.496                       | 0.458                   | -                      | -                        | 0.110                      |
| AGO2-TUT1     | 0.490                       | 0.401                   | -                      | 0.179                    | 0.048                      |
| CLIC4-CLTC    | 0.490                       | 0.464                   | -                      | -                        | 0.086                      |
| ATM-DICER1    | 0.484                       | 0.456                   | -                      | -                        | 0.092                      |
| CCND1-RBPJ    | 0.481                       | 0.469                   | -                      | -                        | 0.062                      |
| POU2F1-NFIA   | 0.469                       | 0.455                   | -                      | 0.067                    | -                          |
| TUT1-AGO1     | 0.455                       | 0.360                   | -                      | 0.179                    | 0.048                      |
| SMAD4-CLIC4   | 0.453                       | 0.453                   | -                      | -                        | -                          |
| ASH1L-CHD7    | 0.453                       | 0.306                   | -                      | 0.153                    | 0.144                      |
| AGO2-CELF1    | 0.451                       | 0.368                   | -                      | 0.128                    | 0.085                      |
| AGO1-HSPA8    | 0.435                       | 0.158                   | -                      | 0.346                    | 0.057                      |
| SMAD4-HIPK2   | 0.432                       | 0.418                   | -                      | -                        | 0.064                      |
| ULK1-HSPA8    | 0.426                       | 0.416                   | -                      | 0.058                    | -                          |
| CCND1-CELF1   | 0.423                       | 0.410                   | -                      | -                        | 0.062                      |
| CDKN1A-KLF6   | 0.409                       | 0.370                   | -                      | 0.058                    | 0.085                      |
| RB1CC1-HSPA8  | 0.406                       | 0.406                   | -                      | -                        | -                          |
| NFIA-DICER1   | 0.403                       | 0.390                   | -                      | -                        | 0.062                      |

PPI – protein-protein interaction

**Supplementary Table S7 Signaling pathways and biological processes associated with deregulated expression of miR-18a-5p, miR-18a-3p, miR-92a-3p, miR-30e-5p, and miR-26a-5p and their target genes.**

| Category              | Description                                                       | Term name  | Gene ratio | Bg ratio  | FDR value             | P-value               |
|-----------------------|-------------------------------------------------------------------|------------|------------|-----------|-----------------------|-----------------------|
| KEGG pathway          | Cell cycle                                                        | hsa04110   | 81/2784    | 126/8190  | $8.88 \cdot 10^{-10}$ | $2.67 \cdot 10^{-12}$ |
| KEGG pathway          | Salmonella infection                                              | hsa05132   | 131/2784   | 249/8190  | $1.14 \cdot 10^{-7}$  | $6.86 \cdot 10^{-10}$ |
| KEGG pathway          | Cellular senescence                                               | hsa04218   | 89/2784    | 156/8190  | $2.48 \cdot 10^{-7}$  | $2.24 \cdot 10^{-9}$  |
| KEGG pathway          | Viral carcinogenesis                                              | hsa05203   | 108/2784   | 204/8190  | $1.18 \cdot 10^{-6}$  | $1.41 \cdot 10^{-8}$  |
| KEGG pathway          | Protein processing in endoplasmic reticulum                       | hsa04141   | 92/2784    | 171/8190  | $3.80 \cdot 10^{-6}$  | $6.14 \cdot 10^{-8}$  |
| KEGG pathway          | Epstein-Barr virus infection                                      | hsa05169   | 105/2784   | 202/8190  | $3.80 \cdot 10^{-6}$  | $7.83 \cdot 10^{-8}$  |
| KEGG pathway          | Ubiquitin mediated proteolysis                                    | hsa04120   | 79/2784    | 142/8190  | $3.80 \cdot 10^{-6}$  | $7.99 \cdot 10^{-8}$  |
| KEGG pathway          | Amyotrophic lateral sclerosis                                     | hsa05014   | 170/2784   | 364/8190  | $8.18 \cdot 10^{-6}$  | $1.96 \cdot 10^{-7}$  |
| KEGG pathway          | Alzheimer disease                                                 | hsa05010   | 177/2784   | 384/8190  | $1.23 \cdot 10^{-5}$  | $3.33 \cdot 10^{-7}$  |
| KEGG pathway          | p53 signaling pathway                                             | hsa04115   | 45/2784    | 73/8190   | $3.82 \cdot 10^{-5}$  | $1.15 \cdot 10^{-6}$  |
| KEGG pathway          | Human T-cell leukemia virus 1 infection                           | hsa05166   | 109/2784   | 222/8190  | $5.08 \cdot 10^{-5}$  | $1.80 \cdot 10^{-6}$  |
| KEGG pathway          | Chronic myeloid leukemia                                          | hsa05220   | 46/2784    | 76/8190   | $5.08 \cdot 10^{-5}$  | $1.83 \cdot 10^{-6}$  |
| KEGG pathway          | Thyroid hormone signaling pathway                                 | hsa04919   | 66/2784    | 121/8190  | $5.70 \cdot 10^{-5}$  | $2.37 \cdot 10^{-6}$  |
| KEGG pathway          | TGF-beta signaling pathway                                        | hsa04350   | 54/2784    | 94/8190   | $5.70 \cdot 10^{-5}$  | $2.40 \cdot 10^{-6}$  |
| KEGG pathway          | Nucleocytoplasmic transport                                       | hsa03013   | 60/2784    | 108/8190  | $6.26 \cdot 10^{-5}$  | $3.06 \cdot 10^{-6}$  |
| KEGG pathway          | Parkinson disease                                                 | hsa05012   | 126/2784   | 266/8190  | $6.26 \cdot 10^{-5}$  | $3.15 \cdot 10^{-6}$  |
| KEGG pathway          | FoxO signaling pathway                                            | hsa04068   | 70/2784    | 131/8190  | $6.26 \cdot 10^{-5}$  | $3.19 \cdot 10^{-6}$  |
| KEGG pathway          | Shigellosis                                                       | hsa05131   | 118/2784   | 247/8190  | $7.13 \cdot 10^{-5}$  | $3.85 \cdot 10^{-6}$  |
| KEGG pathway          | Pathways of neurodegeneration - multiple diseases                 | hsa05022   | 207/2784   | 476/8190  | $1.02 \cdot 10^{-4}$  | $5.83 \cdot 10^{-6}$  |
| KEGG pathway          | Prion disease                                                     | hsa05020   | 127/2784   | 273/8190  | $1.49 \cdot 10^{-4}$  | $8.95 \cdot 10^{-6}$  |
| GO biological process | histone modification                                              | GO:0016570 | 269/5766   | 494/18800 | $5.98 \cdot 10^{-25}$ | $9.40 \cdot 10^{-29}$ |
| GO biological process | proteasomal protein catabolic process                             | GO:0010498 | 267/5766   | 496/18800 | $5.32 \cdot 10^{-24}$ | $1.67 \cdot 10^{-27}$ |
| GO biological process | regulation of mitotic cell cycle                                  | GO:0007346 | 244/5766   | 478/18800 | $9.45 \cdot 10^{-18}$ | $4.45 \cdot 10^{-21}$ |
| GO biological process | proteasome-mediated ubiquitin-dependent protein catabolic process | GO:0043161 | 217/5766   | 414/18800 | $1.82 \cdot 10^{-17}$ | $1.14 \cdot 10^{-20}$ |
| GO biological process | mitotic cell cycle phase transition                               | GO:0044772 | 226/5766   | 440/18800 | $6.19 \cdot 10^{-17}$ | $4.86 \cdot 10^{-20}$ |
| GO biological process | peptidyl-lysine modification                                      | GO:0018205 | 202/5766   | 392/18800 | $3.19 \cdot 10^{-15}$ | $3.01 \cdot 10^{-18}$ |



|                       |                                                   |            |          |           |                       |                       |
|-----------------------|---------------------------------------------------|------------|----------|-----------|-----------------------|-----------------------|
| GO biological process | regulation of protein stability                   | GO:0031647 | 162/5766 | 300/18800 | $2.06 \cdot 10^{-14}$ | $2.41 \cdot 10^{-17}$ |
| GO biological process | mitotic nuclear division                          | GO:0140014 | 159/5766 | 293/18800 | $2.06 \cdot 10^{-14}$ | $2.59 \cdot 10^{-17}$ |
| GO biological process | positive regulation of organelle organization     | GO:0010638 | 235/5766 | 487/18800 | $1.08 \cdot 10^{-13}$ | $1.53 \cdot 10^{-16}$ |
| GO biological process | chromosome segregation                            | GO:0007059 | 179/5766 | 348/18800 | $1.97 \cdot 10^{-13}$ | $3.21 \cdot 10^{-16}$ |
| GO biological process | sister chromatid segregation                      | GO:0000819 | 119/5766 | 205/18800 | $1.97 \cdot 10^{-13}$ | $3.41 \cdot 10^{-16}$ |
| GO biological process | regulation of DNA metabolic process               | GO:0051052 | 226/5766 | 472/18800 | $9.26 \cdot 10^{-13}$ | $1.74 \cdot 10^{-15}$ |
| GO biological process | DNA replication                                   | GO:0006260 | 149/5766 | 280/18800 | $1.19 \cdot 10^{-12}$ | $2.43 \cdot 10^{-15}$ |
| GO biological process | spindle organization                              | GO:0007051 | 109/5766 | 188/18800 | $3.03 \cdot 10^{-12}$ | $6.67 \cdot 10^{-15}$ |
| GO biological process | organelle fission                                 | GO:0048285 | 232/5766 | 493/18800 | $3.52 \cdot 10^{-12}$ | $8.30 \cdot 10^{-15}$ |
| GO biological process | peptidyl-lysine acetylation                       | GO:0018394 | 107/5766 | 184/18800 | $3.54 \cdot 10^{-12}$ | $8.90 \cdot 10^{-15}$ |
| GO biological process | regulation of cell cycle phase transition         | GO:1901987 | 201/5766 | 415/18800 | $5.65 \cdot 10^{-12}$ | $1.53 \cdot 10^{-14}$ |
| GO biological process | nuclear division                                  | GO:0000280 | 213/5766 | 446/18800 | $5.65 \cdot 10^{-12}$ | $1.60 \cdot 10^{-14}$ |
| GO biological process | internal peptidyl-lysine acetylation              | GO:0018393 | 101/5766 | 173/18800 | $1.17 \cdot 10^{-11}$ | $3.51 \cdot 10^{-14}$ |
| GO biological process | positive regulation of cellular catabolic process | GO:0031331 | 213/5766 | 449/18800 | $1.17 \cdot 10^{-11}$ | $3.81 \cdot 10^{-14}$ |

---

Bg – background, FDR – false discovery rate

**Supplementary Table S8** Cox proportional hazards model - association of clinical parameters and flow-cytometry parameters with overall survival (OS) and progression free survival (PFS) of multiple myeloma (MM) patients.

| Characteristics at MM diagnosis (N = 70)              | Overall survival (OS) |                       | Progression-free survival (PFS) |                       |
|-------------------------------------------------------|-----------------------|-----------------------|---------------------------------|-----------------------|
|                                                       | HR (95% CI)           | <i>p</i> <sup>1</sup> | HR (95% CI)                     | <i>p</i> <sup>1</sup> |
| <b>Clinical characteristics</b>                       |                       |                       |                                 |                       |
| ISS 1 - reference                                     | —                     | —                     | —                               | —                     |
| ISS stage 2 vs. stage 1                               | 2.53 (0.92–6.94)      | 0.071                 | 2.88 (1.18–7.01)                | <b>0.020</b>          |
| ISS stage 3 vs. stage 1                               | 2.93 (1.09–7.87)      | <b>0.033</b>          | 4.03 (1.74–9.30)                | <b>0.001</b>          |
| IgG - reference                                       | —                     | —                     | —                               | —                     |
| IgA vs. IgG                                           | 1.18 (0.54–2.60)      | 0.675                 | 0.73 (0.37–1.46)                | 0.378                 |
| Other vs. IgG                                         | 0.22 (0.05–0.93)      | <b>0.039</b>          | 0.49 (0.21–1.13)                | 0.095                 |
| Age                                                   | 1.10 (1.06–1.14)      | <b>&lt;0.001</b>      | 1.08 (1.04–1.12)                | <b>&lt;0.001</b>      |
| Hemoglobin level (g·l <sup>-1</sup> )                 | 0.99 (0.97–1.01)      | 0.196                 | 0.98 (0.96–1.00)                | <b>0.010</b>          |
| Thrombocyte count (10 <sup>9</sup> ·l <sup>-1</sup> ) | 0.99 (0.99–1.00)      | <b>0.003</b>          | 1.00 (0.99–1.00)                | 0.113                 |
| Calcium total level (mmol·l <sup>-1</sup> )           | 0.32 (0.10–1.10)      | 0.071                 | 0.44 (0.16–1.24)                | 0.121                 |
| Albumin level (g·l <sup>-1</sup> )                    | 0.89 (0.84–0.94)      | <b>&lt;0.001</b>      | 0.91 (0.87–0.96)                | <b>&lt;0.001</b>      |
| Beta-2-microglobulin (mg·l <sup>-1</sup> )            | 1.03 (1.00–1.05)      | 0.051                 | 1.02 (1.00–1.04)                | 0.081                 |
| LDH (μkat·l <sup>-1</sup> )                           | 1.35 (1.09–1.68)      | <b>0.006</b>          | 1.40 (1.13–1.73)                | <b>0.002</b>          |
| CRP (mg·l <sup>-1</sup> )                             | 1.01 (1.00–1.02)      | <b>0.049</b>          | 1.01 (1.01–1.02)                | <b>0.001</b>          |
| <b>Flow-cytometry</b>                                 |                       |                       |                                 |                       |
| % PC – peripheral blood                               | 1.09 (0.95–1.25)      | 0.219                 | 1.24 (1.11–1.39)                | <b>0.000</b>          |
| CD28 A-PC                                             | 1.01 (0.99–1.02)      | 0.387                 | 1.01 (1.00–1.02)                | <b>0.012</b>          |
| CD200 A-PC                                            | 1.01 (1.00–1.03)      | <b>0.030</b>          | 1.00 (0.99–1.01)                | 0.984                 |

<sup>1</sup> *p*-values smaller than 0.1 reported

**Supplementary Table S9** Cox proportional hazards model - association of clinical parameters and flow-cytometry parameters with overall survival (OS) and progression free survival (PFS) of extramedullary disease patients (EMD) patients.

| Characteristics at EMD diagnosis (N = 33)  | Overall survival (OS) |                       | Progression-free survival (PFS) |                       |
|--------------------------------------------|-----------------------|-----------------------|---------------------------------|-----------------------|
|                                            | HR (95% CI)           | <i>p</i> <sup>1</sup> | HR (95% CI)                     | <i>p</i> <sup>1</sup> |
| <b>Clinical characteristics</b>            |                       |                       |                                 |                       |
| ISS 1 - reference                          | –                     | –                     | –                               | –                     |
| ISS stage 2 vs. stage 1                    | 1.07 (0.37–3.10)      | 0.903                 | 2.61 (0.91–7.51)                | 0.075                 |
| ISS stage 3 vs. stage 1                    | 2.43 (0.88–6.73)      | 0.088                 | 3.98 (1.32–11.96)               | <b>0.014</b>          |
| Substage A - reference                     | –                     | –                     | –                               | –                     |
| Durie-Salmon substage B vs. A              | 2.64 (0.98–7.09)      | 0.054                 | 2.67 (1.07–6.67)                | <b>0.036</b>          |
| IgG - reference                            | –                     | –                     | –                               | –                     |
| IgA vs. IgG                                | 0.32 (0.12–0.85)      | <b>0.023</b>          | 0.56 (0.24–1.33)                | 0.190                 |
| Other vs. IgG                              | 0.60 (0.17–2.15)      | 0.436                 | 1.49 (0.52–4.29)                | 0.464                 |
| Creatinine level (μmol·l <sup>-1</sup> )   | 1.00 (1.00–1.01)      | 0.059                 | 1.00 (1.00–1.01)                | 0.066                 |
| Beta-2-microglobulin (mg·l <sup>-1</sup> ) | 1.07 (1.01–1.13)      | <b>0.018</b>          | 1.04 (0.99–1.10)                | 0.091                 |
| LDH (μkat·l <sup>-1</sup> )                | 1.12 (1.04–1.19)      | <b>0.002</b>          | 1.12 (1.04–1.21)                | <b>0.002</b>          |
| CRP (mg·l <sup>-1</sup> )                  | 1.02 (1.01–1.04)      | <b>0.012</b>          | 1.02 (1.00–1.03)                | 0.052                 |
| <b>miRNA<sup>#</sup></b>                   |                       |                       |                                 |                       |
| miR-18a-3p                                 | 1.22 (0.98–1.52)      | 0.075                 | 1.21 (0.97–1.51)                | 0.093                 |
| miR-30e-5p                                 | 1.01 (1.00–1.02)      | 0.095                 | 1.01 (1.00–1.01)                | 0.057                 |
| <b>Flow-cytometry</b>                      |                       |                       |                                 |                       |
| % PC – peripheral blood                    | 1.87 (1.30–2.68)      | <b>0.001</b>          | 1.90 (1.31–2.75)                | <b>0.001</b>          |
| % PC – bone marrow                         | 1.02 (1.00–1.04)      | <b>0.043</b>          | 1.01 (0.99–1.03)                | 0.259                 |
| CD28 A-PC                                  | 1.00 (0.99–1.02)      | 0.771                 | 1.01 (1.00–1.02)                | 0.051                 |

<sup>1</sup>*p*-values smaller than 0.1 reported; <sup>#</sup>HR describes association of length of OS/PFS with 0.1 increase of respective miRNA.

**Supplementary Table S10** Clinical characteristics of patients involved in the study at the time of disease diagnosis.

| Basic characteristics at diagnosis <sup>1</sup>        |                  | MM (N = 70)         | EMD (N = 33)       | p <sup>2</sup> |
|--------------------------------------------------------|------------------|---------------------|--------------------|----------------|
| Sex                                                    | woman            | 36 (51.4%)          | 7 (21.2%)          | <b>0.005</b>   |
|                                                        | man              | 34 (48.6%)          | 26 (78.8%)         |                |
| Age                                                    | ≤60              | 15 (21.4%)          | 11 (33.3%)         | 0.269          |
|                                                        | 61–70            | 25 (35.7%)          | 6 (18.2%)          |                |
|                                                        | 71–80            | 25 (35.7%)          | 14 (42.4%)         |                |
|                                                        | >80              | 5 (7.1%)            | 2 (6.1%)           |                |
|                                                        | median (min–max) | 68.5 (40.0–89.0)    | 69.0 (44.0–82.0)   |                |
| Follow-up (months)                                     | median (min–max) | 23.9 (0.3–126.9)    | 13.9 (0.2–69.4)    | <b>0.001</b>   |
| ECOG                                                   | 0                | 16 (22.9%)          | 1 (3.0%)           | <b>0.045</b>   |
|                                                        | 1                | 26 (37.1%)          | 14 (42.4%)         |                |
|                                                        | 2                | 19 (27.1%)          | 10 (30.3%)         |                |
|                                                        | 3–4              | 9 (12.9%)           | 8 (24.2%)          |                |
| ISS                                                    | stage 1          | 16 (22.9%)          | 11 (33.3%)         | 0.462          |
|                                                        | stage 2          | 26 (37.1%)          | 9 (27.3%)          |                |
|                                                        | stage 3          | 28 (40.0%)          | 13 (39.4%)         |                |
| Durie-Salmon stage                                     | I                | 1 (1.4%)            | 0 (0.0%)           | 0.544          |
|                                                        | II               | 10 (14.3%)          | 2 (6.1%)           |                |
|                                                        | III              | 59 (84.3%)          | 31 (93.9%)         |                |
| Durie-Salmon substage                                  | A                | 48 (68.6%)          | 25 (75.8%)         | 0.496          |
|                                                        | B                | 22 (31.4%)          | 8 (24.2%)          |                |
| M-protein type                                         | IgG              | 47 (67.1%)          | 14 (42.4%)         | <b>0.020</b>   |
|                                                        | IgA              | 13 (18.6%)          | 13 (39.4%)         |                |
|                                                        | LC only          | 10 (14.3%)          | 4 (12.1%)          |                |
|                                                        | IgM              | 0 (0.0%)            | 1 (3.0%)           |                |
|                                                        | IgD              | 0 (0.0%)            | 1 (3.0%)           |                |
| Serum M-protein quantity (g·l <sup>-1</sup> ) (N = 99) | median (min–max) | 33.0 (0.0–97.9)     | 16.1 (0.0–80.8)    | <b>0.012</b>   |
| Light chain type                                       | kappa            | 47 (67.1%)          | 15 (45.5%)         | 0.052          |
|                                                        | lambda           | 23 (32.9%)          | 18 (54.5%)         |                |
| Hemoglobin level (g·l <sup>-1</sup> )                  | median (min–max) | 96.1 (69.0–149.0)   | 109.0 (69.0–149.0) | <b>0.029</b>   |
| Thrombocyte count (10 <sup>9</sup> ·l <sup>-1</sup> )  | median (min–max) | 225.5 (89.0–493.0)  | 182.0 (67.0–473.0) | 0.263          |
| Calcium total level (mmol·l <sup>-1</sup> )            | median (min–max) | 2.4 (1.6–3.9)       | 2.4 (1.9–3.4)      | 0.796          |
| Albumin level (g·l <sup>-1</sup> )                     | median (min–max) | 35.2 (15.0–49.8)    | 37.2 (25.6–47.2)   | 0.300          |
| Creatinine level (μmol·l <sup>-1</sup> )               | median (min–max) | 102.5 (45.0–1346.0) | 95.0 (46.0–540.0)  | 0.638          |
| Beta-2-microglobulin (mg·l <sup>-1</sup> ) (N = 101)   | median (min–max) | 4.7 (1.9–50.0)      | 3.6 (1.7–27.4)     | 0.356          |
| LDH (μkat·l <sup>-1</sup> ) (N = 102)                  | median (min–max) | 3.3 (1.4–9.9)       | 3.7 (2.3–35.2)     | <b>0.025</b>   |
| CRP (mg·l <sup>-1</sup> ) (N = 102)                    | median (min–max) | 5.7 (0.0–136.0)     | 6.3 (0.0–99.6)     | 0.459          |
| Plasmocyte count (%) – bone marrow cytology (N = 100)  | median (min–max) | 39.9 (2.8–88.4)     | 33.9 (3.6–81.6)    | 0.3548         |

<sup>1</sup>Described using N (%) in categorical variables and median (minimum–maximum) in continuous variables.

<sup>2</sup>p-value of Fisher's exact test in categorical variables and Mann-Whitney U test in continuous variables.

MM – multiple myeloma, EMD – extramedullary disease, ISS – international staging system, LDH – lactate dehydrogenase, CRP – C-reactive protein

**Supplementary Table S11** Treatment in the first line after extramedullary disease (EMD) or multiple myeloma (MM) diagnosis.

| Treatment regimen in first line after MM / EMD diagnosis                    | MM (N = 70) | EMD (N = 33) |
|-----------------------------------------------------------------------------|-------------|--------------|
| <b>bortezomib</b> + cyclophosphamide + dexamethasone                        | 22 (31.4%)  | 10 (30.3%)   |
| <b>bortezomib</b> + doxorubicin + dexamethasone                             | 11 (15.7%)  | 4 (12.1%)    |
| <b>bortezomib</b> + <b>thalidomide</b> + dexamethasone                      | 7 (10.0%)   | 3 (9.1%)     |
| <b>bortezomib</b> + dexamethasone                                           | 7 (10.0%)   | 2 (6.1%)     |
| <b>bortezomib</b> + <b>lenalidomide</b> + dexamethasone                     | 7 (10.0%)   | 1 (3.0%)     |
| <b>bortezomib</b> + <b>thalidomide</b> + cyclophosphamide + dexamethasone   | 4 (5.7%)    | 2 (6.1%)     |
| salvage autologous transplantation                                          | –           | 2 (6.1%)     |
| <b>lenalidomide</b> + doxorubicin + dexamethasone                           | –           | 2 (6.1%)     |
| <b>bortezomib</b> + prednisone                                              | 2 (2.9%)    | –            |
| <b>bortezomib</b> + melphalan + prednisone                                  | 2 (2.9%)    | –            |
| <b>lenalidomide</b> + <b>daratumumab</b> + dexamethasone                    | –           | 1 (3.0%)     |
| <b>lenalidomide</b> + <b>carfilzomib</b> + dexamethasone                    | –           | 1 (3.0%)     |
| <b>daratumumab</b> + dexamethasone + melflufen                              | –           | 1 (3.0%)     |
| <b>carfilzomib</b> + melphalan + prednisone                                 | 1 (1.4%)    | –            |
| <b>bortezomib</b> + <b>thalidomide</b> + doxorubicin + dexamethasone        | 1 (1.4%)    | –            |
| <b>bortezomib</b> + melphalan + dexamethasone                               | –           | 1 (3.0%)     |
| <b>bortezomib</b> + melphalan + <b>daratumumab</b> + prednisone             | 1 (1.4%)    | –            |
| <b>bortezomib</b> + <b>lenalidomide</b> + methylprednisolon                 | –           | 1 (3.0%)     |
| <b>bortezomib</b> + <b>lenalidomide</b> + dexamethasone + <b>isatuximab</b> | 1 (1.4%)    | –            |
| <b>bortezomib</b> + cyclophosphamide + prednisone                           | –           | 1 (3.0%)     |
| <b>bortezomib</b> + cyclophosphamide + <b>daratumumab</b> + dexamethasone   | 1 (1.4%)    | –            |
| <b>bortezomib</b> + cyclophosphamide                                        | 1 (1.4%)    | –            |
| Without treatment (patient died)                                            | 2 (2.9%)    | 1 (3.0%)     |
| Transplantation                                                             | 21 (30.0%)  | 7 (21.2%)    |

**Supplementary Table S12** Previous therapy in any treatment line before secondary extramedullary disease (EMD) diagnosis.

| Previous therapy of patients diagnosed with secondary EMD (N = 10 patients) | N (%)       |
|-----------------------------------------------------------------------------|-------------|
| <b>Proteasome inhibitors (PI)</b>                                           | 9 (90.0%)   |
| bortezomib                                                                  | 8 (80.0%)   |
| carfilzomib                                                                 | 1 (10.0%)   |
| <b>Immunomodulatory drugs (IMiD)</b>                                        | 6 (60.0%)   |
| lenalidomide                                                                | 4 (40.0%)   |
| thalidomide                                                                 | 3 (30.0%)   |
| <b>Corticosteroids</b>                                                      | 10 (100.0%) |
| dexamethasone                                                               | 9 (90.0%)   |
| prednisone                                                                  | 1 (10.0%)   |
| <b>Conventional chemotherapy</b>                                            | 8 (80.0%)   |
| bendamustine                                                                | 1 (10.0%)   |
| cyclophosphamide                                                            | 5 (50.0%)   |
| doxorubicin                                                                 | 5 (50.0%)   |
| vincristine                                                                 | 1 (10.0%)   |
| <b>Transplantation</b>                                                      | 5 (50.0%)   |

**Supplementary Table S13** The IDs of microRNAs assays used in validation phase of the study.

| miRNA          | Assay ID   |
|----------------|------------|
| hsa-miR-18a-5p | 478551_mir |
| hsa-miR-339-3p | 478325_mir |
| hsa-miR-18a-3p | 477944_mir |
| hsa-miR-92a-3p | 477827_mir |
| hsa-miR-424-3p | 478091_mir |
| hsa-miR-29a-3p | 478587_mir |
| hsa-miR-126-3p | 477887_mir |
| hsa-miR-26a-5p | 477995_mir |
| hsa-miR-708-5p | 478197_mir |
| hsa-miR-30e-5p | 478388_mir |
| hsa-miR-107    | 478254_mir |
